# Supplementary material for: Optimization of GC-MS Method for Analysis of Basil Essential Oils from Algeria: Design of Experiments and Exploratory Pattern Recognition
Source: Hindawi journal article supplement (doi:10.1155/2022/5880539), 2022-10-13
Supplement: f1 [file 5880539.f1.docx]

TABLE 1:Study of dependent variables first factorial design.

| Run | Coded variable | Natural condition | Number of peaks | Experimental retention (resolution) |
| --- | --- | --- | --- | --- |
|  | S GFR SR | S GFR SR |  |  |
| 1  2  3  4  5  6  7  8  9  10  11 | -1 -1 -1  +1 -1 -1  -1 +1 -1  +1 +1 -1  -1 -1 +1  +1 -1 +1  -1 +1 +1  +1 +1 +1  0 0 0  0 0 0  0 0 0 | 2 0.6  6 0.6  2 1.3  6 1.3  2 0.6  6 0.6  2 1.3  6 1.3  4 0.95  4 0.95  4 0.95 | 67  100  103  120  97  128  126  170  126  124  126 | 0.680  0.000  0.780  0.336  0.570  0.000  0.602  0.000  0.480  0.498  0.400 |

S, Slope (°C/min); GFR, Gas flow rate (mL/min); SR, Split ratio.

TABLE 2: Doehlert matrix for three parameters (coded variables).

| X1 5 levels | X2 7 levels | X3 3 levels |
| --- | --- | --- |
| 0 | 0 | 0 |
| 1.0 | 0 | 0 |
| -1.0 | 0 | 0 |
| 0.5 | 0.866 | 0 |
| -0.5 | -0.866 | 0 |
| 0.5 | -0.866 | 0 |
| -0.5 | 0.866 | 0 |
| 0.5 | 0.2887 | 0.8165 |
| -0.5 | -0.2887 | -0.8165 |
| 0.5  0  -0.5  0 | -0.2887  0.5774  0.2887  -0.5774 | -0.8165  -0.8165  0.8165  0.8165 |
